# Supplementary material for: A bio-inspired MXene/quaternary chitosan membrane with a “brick-and-mortar” structure towards high-performance photothermal conversion
Source: Royal Society of Chemistry journal article supplement (doi:10.1039/d2tc00571a), 2022-01-01
Supplement: d2tc00571a1.pdf [file d2tc00571a1.pdf]

**Bio-inspired MXene/quaternary chitosan membrane with“brick-and-mortar”  
structure towards high-performance photothermal conversion**

Yilin Wang<sup>1</sup>, Bo Jiang<sup>1</sup>, Tao Sun, Sha Wang<sup>a, b\*</sup>, Yongcan Jin<sup>a, b\*</sup>

<sup>a</sup> Jiangsu Co-Innovation Center of Efficient Processing and Utilization of Forest Resources, <sup>b</sup>International Innovation Center for Forest Chemicals and Materials, Nanjing Forestry University, Nanjing 210037, China.

<sup>1</sup> These authors contributed equally to this work.

\*Email: swang@njfu.edu.cn (S. Wang); jinyongcan@njfu.edu.cn (Y.C. Jin)

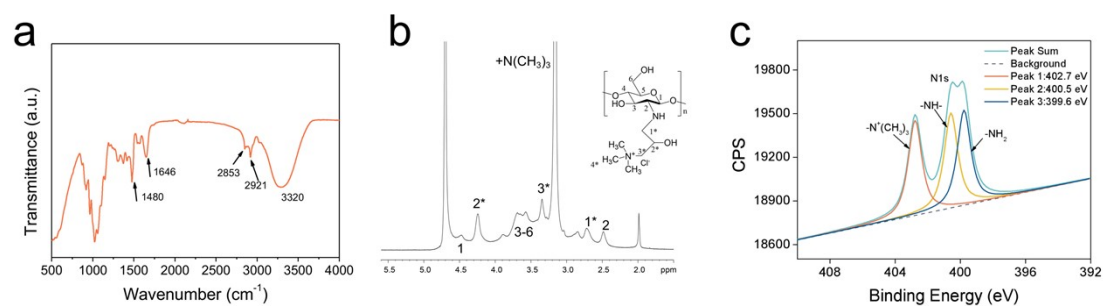

Figure S1. Characterization of the chemical structure of QCS. a. FT-IR spectra of QCS membrane. b. <sup>1</sup>H NMR spectrum of QCS dissolved in D<sub>2</sub>O. c. XPS N1s spectra of QCS.

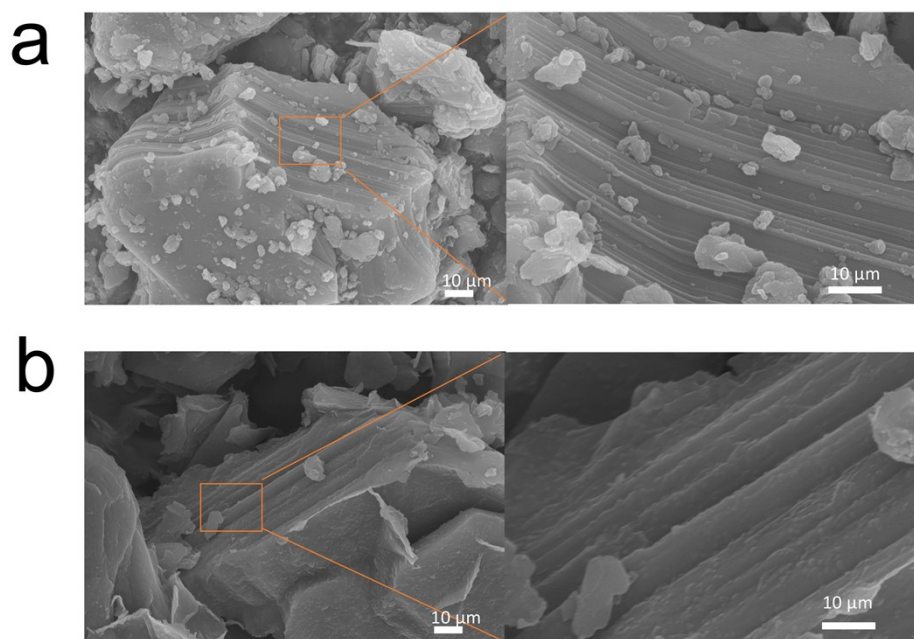

Figure S2. SEM images of Ti<sub>3</sub>AlC<sub>2</sub> and MXene powders studied here. (a) SEM micrographs of Ti<sub>3</sub>AlC<sub>2</sub>. (b) SEM micrographs of MXene.

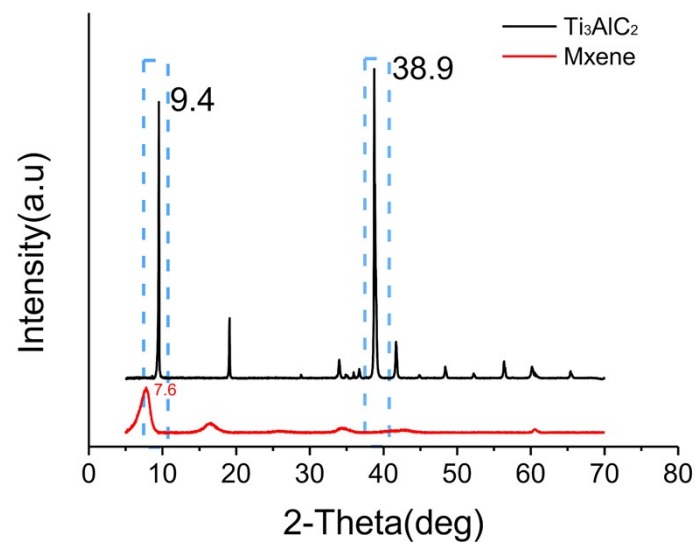

Figure S3. X-ray diffraction of  $\text{Ti}_3\text{AlC}_2$  and freeze-dried MXene power.

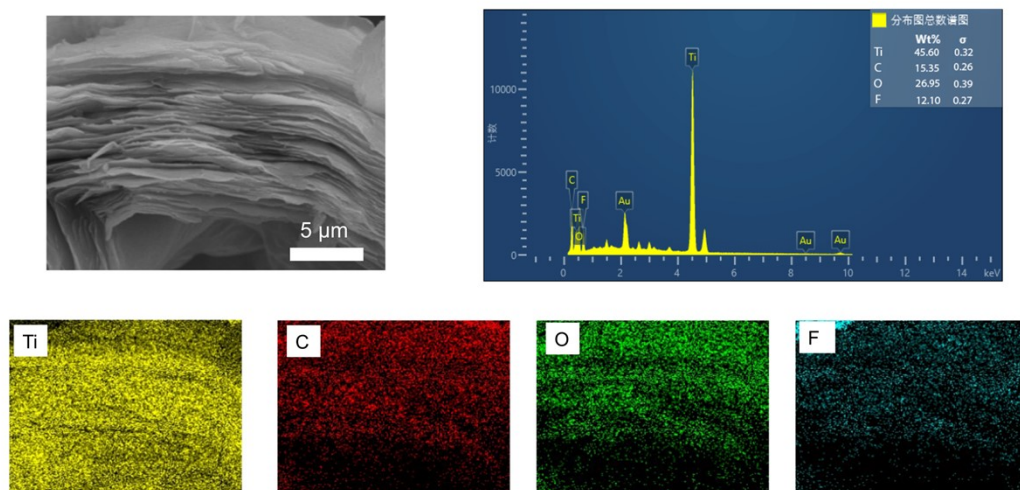

Figure S4. The elemental maps of MXene and the relative content of main elements (Ti, C, O, F).

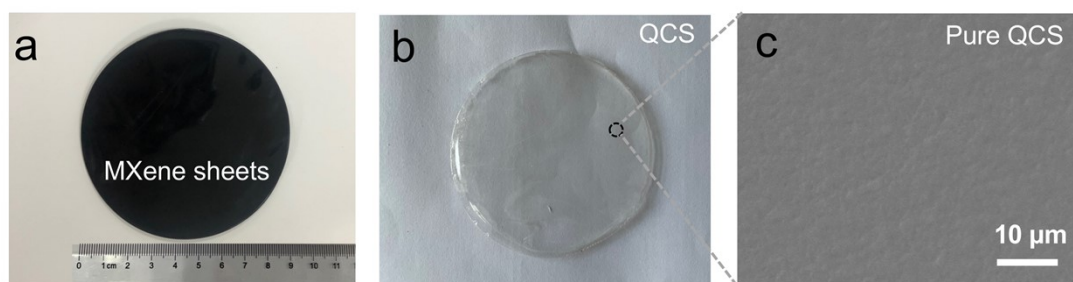

Figure S5. A sample diagram of (a) the MXene/QCS membrane and (b) the pure QCS membrane, and a SEM image of (c) the cross section of the QCS membrane.

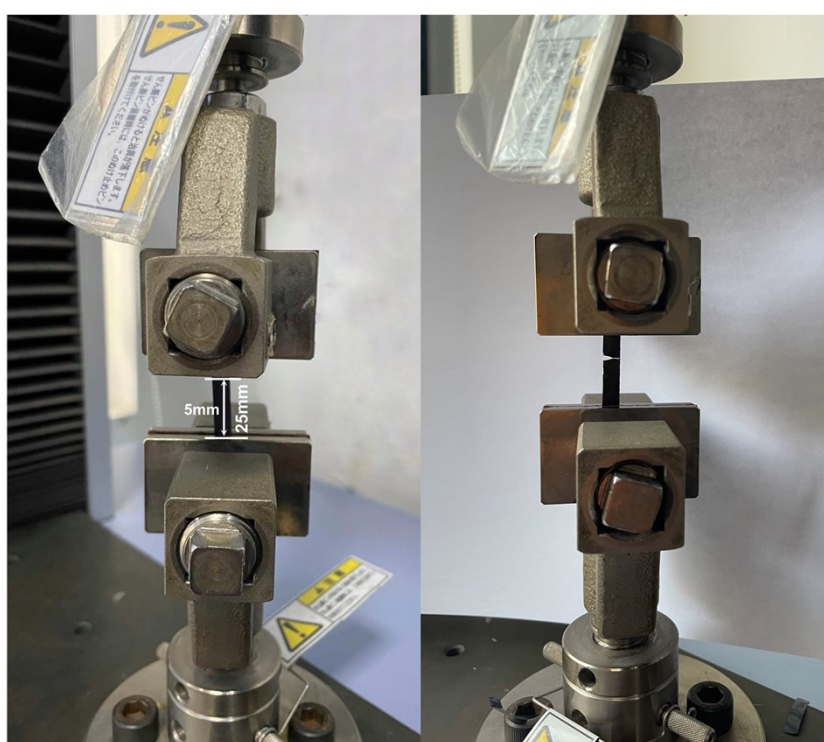

Figure S6. Photographs of a MXene/QCS membrane before a) and after stretching b) under the action of tension machine.

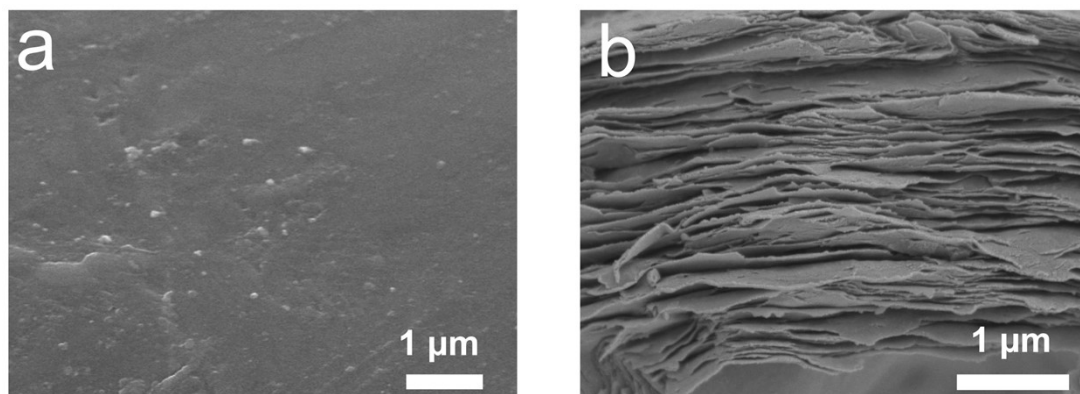

Figure S7. SEM micrograph of the fracture surface of a) pure QCS membrane and b) pure MXene.

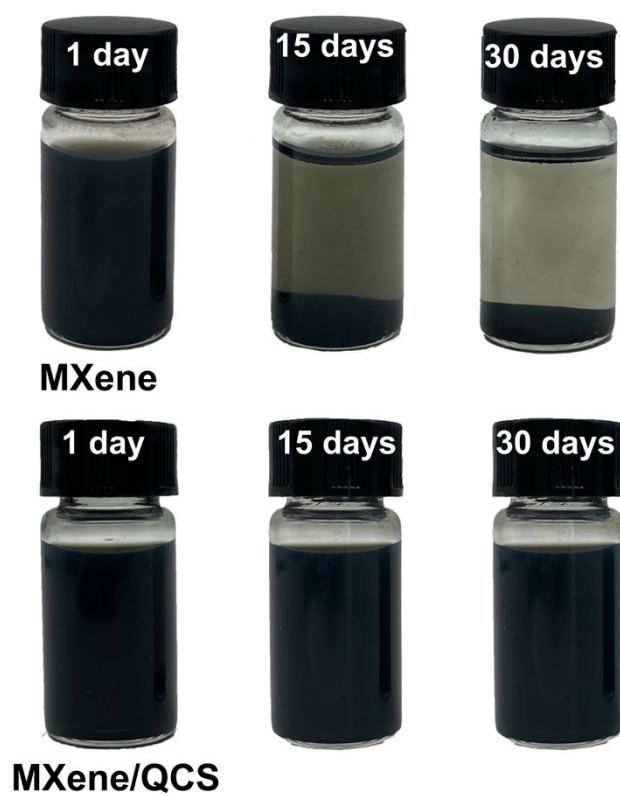

Figure S8. Photographs of MXene and MXene/QCS mixture suspension standing still for 30 days.
